# Supplementary material
Source: Springer Nature journal article supplement (https://www.springermedizin.de/resource/supplementary/13058_2011_2884_MOESM3_ESM.pdf/9702786)
Supplement: MOESM3 [file 9702786]

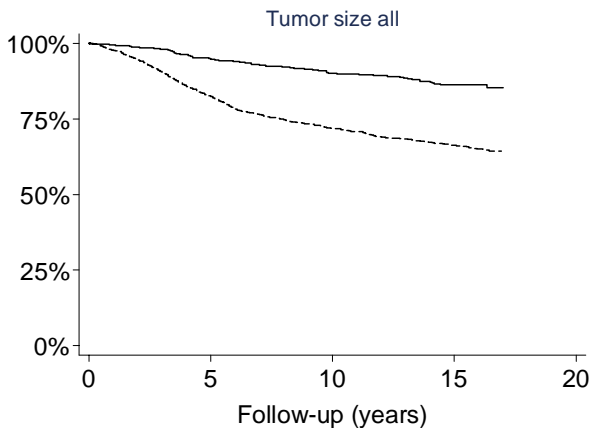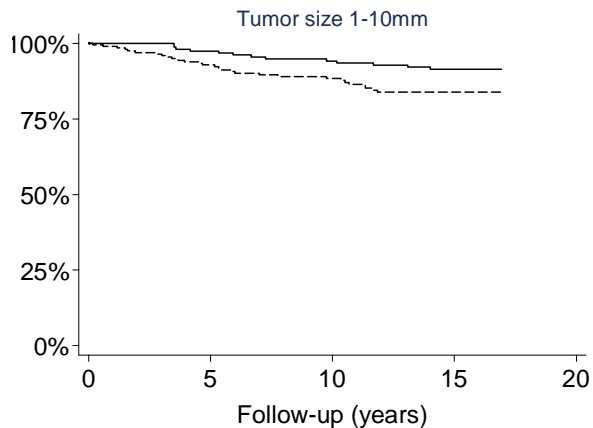

No. At risk

|          |      |      |     |     |
|----------|------|------|-----|-----|
| screened | 408  | 379  | 345 | 313 |
| non-scr  | 1476 | 1086 | 819 | 658 |

LogRank ChiSquared: 60,51 p<.0001 RR:2.91

|          |     |     |     |     |
|----------|-----|-----|-----|-----|
| screened | 158 | 153 | 142 | 132 |
| non-scr  | 207 | 175 | 143 | 116 |

LogRank ChiSquared: 4,73 p=.0296 RR:2.04

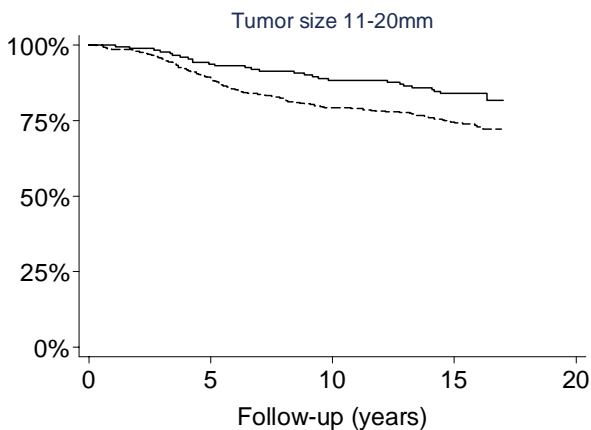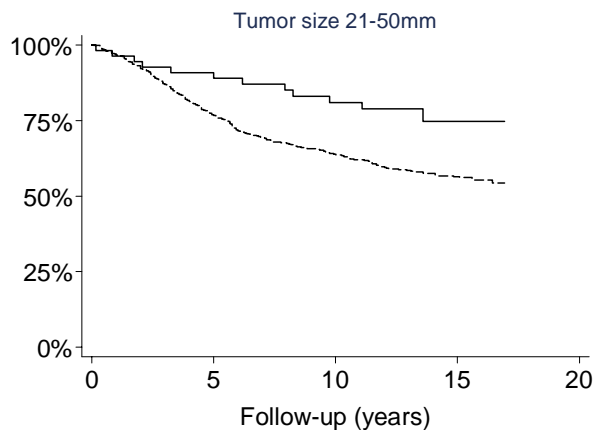

No. At risk

|          |     |     |     |     |
|----------|-----|-----|-----|-----|
| screened | 179 | 163 | 148 | 133 |
| non-scr  | 576 | 465 | 358 | 297 |

LogRank ChiSquared: 7,39 p=.0066 RR:1.75

|          |     |     |     |     |
|----------|-----|-----|-----|-----|
| screened | 55  | 49  | 41  | 37  |
| non-scr  | 581 | 392 | 281 | 214 |

LogRank ChiSquared: 6,86 p<=.0088 RR:2.08
